# Supplementary material
Source: publisher site journal article supplement (https://www.degruyterbrill.com/publication/isbn/9783839440346/downloadAsset/9783839440346_Leseprobe.pdf)
Supplement: Supplementary file 1 [file 9783839440346_Leseprobe.pdf]

NADINE M. SCHÖNECK,  
SABINE RITTER (HG.)

# DIE MITTE ALS KAMPFZONE

WERTORIENTIERUNGEN  
UND ABGRENZUNGSPRAKTIKEN  
DER MITTELSCHICHTEN

**Aus:**

*Nadine M. Schöneck, Sabine Ritter (Hg.)*

**Die Mitte als Kampfzone**

**Wertorientierungen und Abgrenzungspraktiken  
der Mittelschichten**

Oktober 2018, 350 S., kart.

29,99 € (DE), 978-3-8376-4034-2

E-Book:

PDF: 26,99 € (DE), ISBN 978-3-8394-4034-6

EPUB: 26,99 € (DE), ISBN 978-3-7328-4034-2

Angehörige der Mittelschichten befinden sich in einer sozialstrukturellen ›Sandwich-Position‹, die einer permanenten Justierung der Lebensführung und ihrer Maximen bedarf. In Zeiten massiven gesellschaftlichen Wandels fühlen sich viele unter erhöhtem Druck.

Die Beiträge renommierter Sozialwissenschaftlerinnen und Sozialwissenschaftler diskutieren die Strategien der Selbstpositionierung, die Mittelschichtsangehörige verfolgen, und zeigen, wie durch intensivierte Abgrenzung – nach oben und unten – der Druck innerhalb der Gesellschaft steigt. Der Band bietet damit einen hochaktuellen Einblick in die sozialwissenschaftliche Debatte um Befindlichkeiten und Handlungsweisen der Mittelschichten.

**Nadine M. Schöneck** (Dr.) ist Professorin für Soziologie und Empirische Sozialforschung an der Hochschule Niederrhein und Lehrbeauftragte am Institut für Soziologie der Universität Bremen.

**Sabine Ritter** (Dr.) ist Universitätslektorin am Institut für Soziologie der Universität Bremen sowie Studiendekanin des dortigen Fachbereichs Sozialwissenschaften.

Weiteren Informationen und Bestellung unter:

[www.transcript-verlag.de/978-3-8376-4034-2](http://www.transcript-verlag.de/978-3-8376-4034-2)

# Inhalt

---

**Editorische Notizen** | 9

## **Zur Einleitung**

Die gesellschaftliche Mitte als Kampfzone –  
Perspektiven und Fragestellungen

*Nadine M. Schöneck und Sabine Ritter* | 11

## **DIE MITTE DER GESELLSCHAFT**

### **Die Entstehung der Mitte – Ein Paradigma in Politik und Gesellschaft**

*Herfried Münkler* | 29

### **Die soziale Mitte und ihr Staat**

Eine soziologische Skizze

*Berthold Vogel* | 39

## **VERMESSUNGEN DER MITTE**

### **Deutschlands Mittelschicht in Abstiegsangst?**

Eine Betrachtung aus ökonomischer Perspektive

*Judith Niehues* | 53

### **Statuspanik in der Mittelschicht?**

Aktuelle Befunde aus der Einstellungsforschung

*Holger Lengfeld und Jessica Ordemann* | 69

### **Die unzufriedene Mitte und die politischen Folgen**

Gerechtigkeitsperzeptionen und Wahlabsichten im Wandel

*Ursula Dallinger* | 85

## WERTORIENTIERUNGEN UND NORMALITÄTSKONSTRUKTIONEN

### **Von Generation zu Generation**

Strategien des Statuserhalts im Kontext von Familien- und Berufsmentalitäten in der Mittelschicht

*Miriam Schad und Nicole Burzan* | 109

### **Paar- und Familienleitbilder der ›Mitte‹ zwischen Persistenz und Wandel**

Eine paar- und heteronormativitätskritische Perspektive

*Christine Wimbauer, Julia Teschlade, Almut Peukert und Mona Motakef* | 125

### **Separate, but central?**

Distinktionspraktiken und Normalitätsanspruch der Mittelschicht in der medialen Repräsentation

*Marlon Barbehön, Marilena Geugjes und Michael Haus* | 143

## ABGRENZUNGEN UND AUSSCHLÜSSE

### **Die ewige Mitte und das Gespenst der Abstiegsgesellschaft**

*Stephan Lessenich* | 163

### **Kosmopolitische Heimat**

Räumliche Selbstvergewisserung im Brennglas transnationaler Ungleichheitskonflikte

*Cornelia Koppetsch* | 179

### **Die Mitte und ihr Anderes**

Flexibilisierte Randzonen des Sozialen  
in Zeiten des Rechtspopulismus

*Silke van Dyk* | 197

### **Rechtspopulistische Mittelschichten als Gefährder gesellschaftlicher Ordnung**

Eine theoretische Skizze

*Uwe Schimank* | 217

## **BEFINDLICHKEITEN UND HANDHABUNGEN**

### **Klassen und Klassifikationen**

Symbolische Grenzziehungen  
in der deutschen Ungleichheitsstruktur

*Patrick Sachweh, Sarah Lenz und Debora Eicher* | 243

### **Über Proletarität und Abgrenzungspraktiken**

Beobachtungen im unteren Dienstleistungssegment

*Friederike Bahl* | 261

### **Wer bin ich oder wo bin ich?**

Identitätsarbeit Mittelschichtsangehöriger in Insolvenz

*Patricia Pfeil, Marion Müller und Udo Dengel* | 277

### **In der Welt sein**

Zur Anverwandlung von Raum und Zeit der Mittelschichten

*Gunter Weidenhaus* | 295

## **DIE MITTE DER GESELLSCHAFT – EINE REPRISÉ ZWEITER ORDNUNG**

### **Der Mittelschicht-Bias der soziologischen Zeitdiagnostik**

*Oliver Dimbath* | 313

**Zu den Autorinnen und Autoren** | 331



## Editorische Notizen

---

Im Nachgang des 38. Kongresses der Deutschen Gesellschaft für Soziologie, der Ende September 2016 an der Universität Bamberg stattfand, und auf dem wir eine Ad-hoc-Gruppe zum Thema »Legitime Ungleichheiten? Wertorientierungen und Abgrenzungspraktiken der Mittelschichten« organisiert hatten, trat der transcript Verlag mit einer Veröffentlichungsanfrage an uns heran.

Knapp zwei Jahre, gut 1.500 E-Mails, 21 Telefonate und drei arbeitsintensive Herausgeberinnentreffen in Bochum später ging das Gesamtwerk dann tatsächlich an den Verlag. Es weist in drei Hinsichten eine gewisse Heterogenität auf: Die Verantwortung für gendersensible Sprache haben wir ganz in die Hand der Autorinnen und Autoren gelegt; einige Beiträge sind lediglich durch Abschnittsüberschriften gegliedert, in anderen wird eine numerische Systematik genutzt; auch die Entscheidung über die Anordnung von Autorinnen und Autoren in Literaturkurzbelegen haben wir den Beitragenden überlassen. Hier zeigt sich, dass die Soziologie – zum Glück! – ein multiparadigmatisches, offenes und allein dem guten Argument und der belastbaren Schlussfolgerung verpflichtetes Fach ist.

Unser Dank gilt an erster Stelle unseren Autorinnen und Autoren, die maßgeblich dazu beigetragen haben, dass dieser Sammelband zwischen zwei Soziologiekongressen entstehen konnte. Des Weiteren danken wir Carolin Bierschenk und Michael Volkmer vom transcript Verlag in Bielefeld für die umsichtige Betreuung unseres Buchprojekts, Doreen Ensemeier, Angela Großkopf, Sophie Krone und Lena Wollenberg aus Bremen für die großartige Unterstützung im Zuge der Manuskripterstellung sowie Angelika Wulff aus Witten/Ruhr für ihr sehr sorgfältiges Korrekturat.

*Bochum und Hamburg im August 2018  
Nadine M. Schöneck und Sabine Ritter*





## Zur Einleitung

Die gesellschaftliche Mitte als Kampfzone –

Perspektiven und Fragestellungen

---

*Nadine M. Schöneck und Sabine Ritter*

»We really lived here, me and my brother, my mum and dad, and, yeah, it seemed like that was life, that's the way life is...«, plauderte Paul McCartney im Frühjahr 2018 in der Küche seines Elternhauses in Liverpool:<sup>1</sup> Das Leben in einer musikalischen Familie, ökonomisch leidlich saturiert, bildungsorientiert, stabilisiert durch den »midcentury social compromise« (Crouch 1999: 53) und beheimatet in einem gutbürgerlichen Reihenhauses in Suburbia, hat der Ex-Beatle weit hinter sich gelassen. Sein Blick auf diese Mittelschichtjugend scheint – wie viele seiner Songtexte ebenfalls andeuten, man denke nur an »Penny Lane« – kein nostalgisch-verklärender, sondern vielmehr ein lakonisch-wohlwollender zu sein. Auf das Klavier im Wohnzimmer, die väterliche Ablehnung von Amerikanismen wie »yeah, yeah, yeah« (»Son, couldn't you sing ›yes, yes, yes‹«?), das Singen im Kirchenchor, den Spülstein für die Wäsche in der Küche, die Eile beim Aufbruch zu Schule und Arbeit. Das war, so McCartney, eben das Leben – in Westeuropa nach dem Zweiten Weltkrieg. Zweifellos: Der Weg, den er von diesem Reihenhauses aus genommen hat, ist exzeptionell. Aber er stellt eben doch eine derjenigen Geschichten dar, die sich aus der Solidität der Mittelschicht heraus entwickelt haben.

Der Nimbus, der der Mittelschichtsgesellschaft anhaftet, ist gewaltig und strahlt hell. Makroperspektivisch lässt sich die Strahlkraft dieses Gesellschaftstyps damit erklären, dass weniger ungleiche, eben stärker mittelschichtige Gesellschaften grundsätzlich als wünschenswert gelten (Littrell et al. 2010; Wilkinson/Pickett 2009), weil sie insbesondere mit wirtschaftlicher Prosperität (Amoranto et al. 2010; Easterly 2001; Ravallion 2010), politischer Stabilität (Acemoglu/Robinson 2006; Barro 1999; Birdsall 2015; Solimano 2008) und

---

**1** | Der Clip mit der kompletten Sendung findet sich unter <https://www.youtube.com/watch?v=QjvzCTqkBDQ> (09.08.2018), die hier zitierte Stelle an der Position 09:45.

gesellschaftlicher Kohäsion (Larsen 2013) assoziiert werden. Mikroperspektivisch verheißt eine zwiebelartige Gesellschaftsstruktur – gewissermaßen per definitionem – ausreichend Bewegungsmöglichkeiten und Spielraum für auf die Geltung meritokratischer Aufstiegsprinzipien vertrauende Menschen.

Während sich jedoch in den vergangenen rund drei Jahrzehnten in zahlreichen Schwellenländern relativ prosperierende Mittelschichten herauszubilden begonnen haben (Das 2009; Kharas 2010; Ravallion 2010; Wilson/Dragusanu 2008) und – global betrachtet – die Ungleichheit zwischen den Ländern abnimmt, nimmt sie innerhalb vieler Länder der OECD wieder zu (Alderson et al. 2005; Brady 2009; DiPrete 2005; Milanović 2016; OECD 2008, 2011; Weeks 2005). Seit den 1980er, spätestens 1990er Jahren werden objektive Schrumpfungstendenzen und subjektive Abstiegssorgen der Mittelschichtsangehörigen vieler westlich geprägter Gesellschaften intensiv debattiert (Bigot et al. 2012; Ehrenreich 1989; Grabka/Frick 2008; Littrell et al. 2010; Newman 1988; Pressman 2007; Steijn et al. 1998).

Zwar wissen wir, dass das kollektive Selbstbild von Angehörigen einer Gesellschaft und etwa die Einkommensstruktur einer Gesellschaft voneinander abweichen können (Niehues 2014; Schöneck 2017). Aber wir wissen auch, dass Wahrnehmungen – selbst verzerrte – nicht selten einstellungsrelevanter als Realitäten sind (Alesina et al. 2004; Gimpelson/Treisman 2015), sodass die gefühlte Wirklichkeit als eine eigenständige Dimension der Realität bezeichnet werden kann (Glatzer 2008, 2012).

Die starke Anziehungskraft der Mittelschichtsgesellschaft lässt sich schließlich auch in Mehrländerbefragungen wie etwa dem International Social Survey Programme (ISSP) nachweisen: Während gut 60 Prozent der zuletzt im Jahr 2009 rund 56.000 Befragten in 41 Ländern annahmen, in einer (sehr) ungleichen Gesellschaft zu leben, wünschte sich gut die Hälfte der Befragten, in einer Mittelschichtsgesellschaft zu leben. In Deutschland erkannte zu der Zeit noch nicht einmal jeder Fünfte eine Mittelschichtsgesellschaft, demgegenüber waren es gut 57 Prozent, die in der Mittelschichtsgesellschaft den idealen Gesellschaftstypus sahen.

Es stellt sich also die Frage: Wenn das Modell der Mittelschichtsgesellschaft für das insbesondere westlich orientierte Nachkriegseuropa dermaßen bestimmend und leitend war, wenn Göran Therborn (2012: 15) gar von einem »middle-class century« spricht – warum wird dann in der akademischen, der medialen und der politischen Öffentlichkeit über die Mitte, die Mittelschichten, deren (angebliches) Schrumpfen, deren Statuskämpfe und deren Verängstigung seit Jahren leidenschaftlich diskutiert (allein für die Lage in Deutschland: Beise 2009; Bosch/Kalina 2015; Burkhardt et al. 2012; Burzan et al. 2014; Heinze

---

2011; Herbert-Quandt-Stiftung 2007; Koppetsch 2013; Mau 2012; Nachtwey 2016; Schimank et al. 2014; Vogel 2009)<sup>2</sup>

Inzwischen hat die Debatte dramatisch an Fahrt aufgenommen. Anfang 2017 diagnostizierte das Fernsehmagazin »Panorama« die »Krise der Mittelschicht« und berichtete über die »Wachstumsverlierer« unter den Mittelschichtsangehörigen. Anlässlich des SPD-Bundestagswahlkampfes im selben Jahr, der das Thema »Soziale Gerechtigkeit« in den Fokus gerückt hatte, wurde in der ZEIT kontrovers über die Frage debattiert, ob die Mitte denn nun unter verstärktem Druck sei, ob die Ungleichheit zugenommen habe – oder ob nicht (vgl. zum Beispiel Fratzscher 2017). Der hohe Anteil an Zweitstimmen, den die rechtspopulistische »Alternative für Deutschland« (AfD) bei eben dieser Bundestagswahl 2017 für sich verbuchen konnte, wird wiederum von anderen Betrachtern und Beobachterinnen als Indiz einer Spaltung der Gesellschaft gewertet: Dabei wird diskutiert, ob diese Spaltung primär sozioökonomischer Natur sei, also vor allem Einkommens- und Vermögensungleichheiten geschuldet, oder ob sie vielmehr kulturellen Ursprungs wäre (Reckwitz 2017: 371-423). Diagnostiziert wird ein Aufbrechen der Gesellschaft in einen (größeren) Teil modernisierungsbefürwortender und in einen (kleineren) modernisierungsskeptischer Bürgerinnen und Bürger. Scharf zugespitzt schrieb im Zuge der hitzigen Auseinandersetzung um den Rücktritt Mesut Özils aus der deutschen Fußballnationalmannschaft im Juli 2018 die Kolumnistin Margarete Stokowski über die, mit Wilhelm Heitmeyer gesprochen, »deutschen Zustände«: »Wie integriert man sich in eine Gesellschaft wie diese, die immer gespaltener ist und an Hetze immer gewöhnter? Wie integriert man sich in eine Gesellschaft, von der Studien immer wieder bezeugen, dass die allermeisten Leute sich zwar zur politischen Mitte zählen, ihnen dies aber nicht widersprüchlich dazu erscheint, rassistische, antisemitische, homophobe Haltungen zu vertreten?« (Stokowski 2018). Eine nochmals alternative, mit der vorgenannten Argumentation jedoch keineswegs unvereinbare Position ist die These einer über längere Zeit verdrängten Klassenproblematik: »Weil es aussichtslos erscheint, als ungerecht empfundene Verteilungsverhältnisse grundlegend zu korrigieren, neigen Lohnabhängige spontan dazu, Auseinandersetzungen zwischen oben und unten in Konflikte zwischen innen und außen umzudefinieren« (Dörre et al. 2018: 1; vgl. zur »Entsorgung der Klassenfrage« auch Kadritzke 2017).

Auch wir schreiben von der »Mitte als Kampfzone«: Was geschieht in und mit der Mitte der Gesellschaft in Deutschland? Ist die vieldiskutierte Krise der

---

**2** | Dass die Mittelschichtsthematik von erheblicher gesamtgesellschaftlicher Bedeutung ist, lässt sich unter anderem auch daran erkennen, dass »Aus Politik und Zeitgeschichte«, die Beilage der von der Bundeszentrale für politische Bildung herausgegebenen Wochenzeitung »Das Parlament«, ihr im Rahmen einer Trilogie das mittlere Heft widmete: Oben (Heft 15/2014), Mitte (Heft 49/2014) und Unten (10/2015).

Mittelschicht eine Selbstdiagnose bar objektiver Grundlage? Denn immerhin – und auch in diesem Band – ist die Inszenierung der Mittelschicht nicht zuletzt eine wissenschaftliche, mediale und politische Selbstinszenierung. Ist es tatsächlich so, dass sich die Mitte zunehmend von dem wohlfahrtsstaatlich flankierten (Nachkriegs-)Projekt, das sie in Westeuropa und Deutschland groß gemacht hat, verabschiedet? Und: In welchem Verhältnis steht sie zu Rechtspopulismus, Rassismus, Exklusion?

Angehörige der Mittelschichten befinden sich seit der Etablierung von Mittelschichtsgesellschaften in einer potenziell herausfordernden ›Sandwich-Position‹ zwischen oben und unten: Je nach Perspektive sind sie relativ depriviert beziehungsweise privilegiert. Ihr Standing im hierarchischen Ungleichheitsgefüge bedarf einer kontinuierlichen Justierung der eigenen Lebensführung und ihrer Maximen. Damit lastet ein gewisser Druck auf Mittelschichtsangehörigen. In Zeiten größerer gesellschaftlicher Veränderungen, die durch die Folgen fortwährender Globalisierung, arbeitsmarkt- und berufsstrukturellen Wandels, sozialstaatlichen Um- beziehungsweise Abbaus und verschärften Bildungswettbewerbs, aber auch – in jüngster Vergangenheit und Gegenwart – durch eine deutlich gestiegene Zuwanderung und das Erstarken rechtspopulistischer Parteien gekennzeichnet sind, fühlen sich viele Mittelschichtsangehörige unter nochmals erhöhtem Druck. Zugleich tragen sie durch ihr (sozial-)strukturformendes Entscheiden und Handeln häufig dazu bei, dass der diffuse Druck innerhalb der Gesellschaft wächst.

Aus ungleichheitssoziologischer Perspektive interessiert uns vor diesem Hintergrund insbesondere die Frage, welche mehr oder weniger bewussten Strategien der Selbstpositionierung beziehungsweise Selbstpositionierungs-*stärkung* durch intensivierte Abgrenzung – nach oben wie auch nach unten – Angehörige der Mittelschichten verfolgen. Zudem richten wir den Scheinwerfer auf subjektive ungleichheitssensible Wahrnehmungen.

Aus kultursoziologischer Perspektive interessieren uns einerseits die Antriebsmomente solcher Abgrenzungspraktiken, die sich in schichtspezifischen Wertorientierungen manifestieren. Andererseits lassen sich entlang zum Beispiel symbolischer, normativer oder auch ökonomischer Wahrnehmungs- und Deutungsmuster die Rahmenbedingungen ausmachen, die die Selbstvergewisserung und permanente Reproduktion der Mittelschichten sicherstellen.

Neben einer fokussiert ungleichheits- respektive kultursoziologischen Perspektive ist auch eine amalgamierende Betrachtung neuerer Wertorientierungen und Abgrenzungspraktiken von Mittelschichtsangehörigen denkbar.

Zu den zu beantwortenden Leitfragen, die wir den Beitragenden stellten, zählen beispielsweise die folgenden:

- In welchem Verhältnis stehen (sich wandelnde) objektive Lebensbedingungen und (kollektiv-)subjektive ›Programmatiken‹, das heißt Ungleichheits-

und Gerechtigkeitsdiskurse, aber auch Wertorientierungen der sozialen Mitte?

- Woran erkennen Mittelschichtsangehörige einander? Durch welche symbolischen und habituellen Praktiken setzen sie sich sichtbar von oben beziehungsweise unten angrenzenden Schichten ab?
- Welches sind die Normalitätsfolien, vor denen Mittelschichtsangehörige ihre Wertorientierungen konstruieren – und welche Praktiken resultieren daraus?
- Nimmt ›die Mitte‹ die sie umgebende Gesellschaft wirklich einhellig wahr, handelt sie tatsächlich einem weitestgehend uniformen Modell folgend – oder lassen sich vielmehr unterschiedliche Mittelschichtssegmente erkennen, die möglicherweise sogar Tendenzen der Divergenz aufweisen?

Um uns Antworten auf diese Fragen zu nähern, haben wir hier 17 sozialwissenschaftliche Texte zusammengestellt, die die Mitte in Deutschland aus den unterschiedlichsten Richtungen in den Blick nehmen. In ihren konzeptionell-theoretisch wie auch empirisch vielfältigen Zugangsweisen und mit ihren teils kontroversen Befunden decken sie ein breites Spektrum der aktuellen Debatte um die Mittelschichten ab und bieten historische, politologische, ökonomische, ungleichheits- und kultursoziologische Auf- und Einsichten.

Wir verzichteten bewusst auf eine (zum Beispiel sozioökonomische oder kulturelle) Vorab-Definition des Mittelschichtsbegriffs, um zu vermeiden, unseren Autorinnen und Autoren einen – im Zweifelsfall: unseren höchstpersönlichen – Zugang zur Mittelschichtsthematik zu oktroyieren. Vielmehr fanden wir es hochspannend und auch inhaltlich ertragreich, mit erwartbar deutlich unterschiedlichen Annäherungen an den facettenreichen Mittelschichtsbegriff rechnen zu können. Je nach Fragestellung dürfte schließlich auch die spezifische Perspektive (etwa auf Wertorientierungen und Abgrenzungspraktiken *in bestimmten Segmenten* der tendenziell ja doch recht breiten und heterogenen deutschen Mittelschicht) eine Rolle spielen. Darüber hinaus deuten zum Beispiel poststrukturalistische Ansätze die Diversität der Mittelschichtsdefinitionen als Indiz dafür, dass die Mitte ein Produkt machtvoll strukturierter Diskurse ist. Eine vereinheitlichende Vorab-Definition für sämtliche Beiträge wäre daher auch theoretisch und methodologisch gänzlich unangemessen gewesen.

Der Band beginnt mit zwei allgemeinen Überlegungen zur Mitte der Gesellschaft. Aus einer quantifizierenden Makroperspektive widmen sich die darauffolgenden drei Beiträge sozialstrukturellen und ökonomischen Gesichtspunkten der »Mitte als Kampfzone«. Dass und wie die Mitte gleichermaßen Konstrukteur wie Container von entschiedenen und entscheidenden Werten und Normen ist, dass und wie sie Ein- und Ausschlüsse betreibt, diskutieren die folgenden sieben mikrosoziologischen, diskursanalytischen und theoretischen Beiträge. Es schließen sich vier Abhandlungen an, die zumeist auf

empirischem Weg Befindlichkeiten und Handhabungen einerseits und mittelschichtige Selbstvergewisserungen andererseits untersuchen. Den Schluss bildet ein Beitrag, der die sozialwissenschaftliche Diskussion um die Mittelschichten insgesamt kritisch beleuchtet – eine Meta-Analyse, die wiederum selbst von einem Sozialwissenschaftler vorgenommen wird.

Im Einzelnen: Am Anfang der Sammlung stehen zwei etwas kürzere Texte, die – der eine ideengeschichtlich, der andere ungleichheits- und wohlfahrtsstaatssoziologisch – den Rahmen abstecken für die weiteren Beiträge zur Mitte, zu Mittelklassen, Mittelschichten und ihren Status- und Abgrenzungskämpfen.

*Herfried Münkler* stellt die Mitte als die deutsche Gegenwartsgesellschaft dominierende Ordnungskategorie vor und erachtet die hiesige Mitte-Mentalität als überaus stabil. Woher rühren diese Dominanz und Stabilität? Die »Herrschaft der Mittleren« ist ein seit der Antike keineswegs unumstrittenes, jedoch hochwirksames räumliches Denkmodell politischer Ordnung, dessen Alternative – die Idee von Fortschritt, Stillstand, Rückschritt, also von strukturbildenden Zeitdimensionen – wegen kultureller und politischer Kontextbedingungen in den Hintergrund gerückt ist. So ist die Mitte *das* Orientierungsfeld der Deutschen – und bleibt es voraussichtlich bis auf Weiteres.

*Berthold Vogel* betont, dass die Mitte, konkretisiert als erwerbstätige Mittelklasse, analytisch wie politisch untrennbar mit dem arbeitenden Sozialstaat verbunden ist. Er öffnet damit eine zweite wesentliche Perspektive, der dieser Sammelband verpflichtet ist, nämlich eine ungleichheitssoziologische: Der soziologische Blick auf den Staat ist immer zugleich ein nach Ungleichheit forschender, und umgekehrt kommt eine umfassende Sozialstrukturanalyse nicht umhin, die staatliche Prägung der Sozialordnung mit zu beachten. Dementsprechend skizziert Berthold Vogel in zehn Punkten die Zukunft der Mittelklasse unter Bedingungen ihrer Verunsicherungen und Fragmentierungen durch den sich wandelnden Sozialstaat.

Die anschließenden drei Beiträge nehmen sich Vermessungen der Mitte an und diskutieren sozioökonomische und politische Fragen der (vermeintlichen?) Krise der Mittelschichten.

*Judith Niehues* blickt – nach einer Erörterung der Vielfalt gängiger Mittelschichtsdefinitionen – unter einem dezidiert ökonomischen Gesichtspunkt auf die Entwicklung der Mittelschichten in Deutschland und bereitet damit eine objektive Grundlage für die Einordnung subjektiver Bewertungen. Ihrer sich auf sozialwissenschaftliche Analysen stützenden und auf Daten des Sozio-oekonomischen Panels (SOEP) zurückgreifenden einkommensbasierten Mittelschichtsdefinition zufolge erweist sich die »Mitte im engen Sinne« nach vorherigen Schwankungen insbesondere im vergangenen Jahrzehnt als bemerkenswert stabil: Ihr gehört beständig etwa die Hälfte aller Haushalte an. Mit diesem Befund versucht sie, alarmistische Meldungen, denen zufolge die

Mittelschicht immer weiter ausgedünnt werde, zu entkräften. Darüber hinaus zeigt sie anhand von Daten der Allgemeinen Bevölkerungsumfrage der Sozialwissenschaften (ALLBUS), dass auch die starke Adhäsionskraft der Mitte in Bezug auf die subjektive Schichteinstufung der Befragten und der insgesamt weit verbreitete wirtschaftliche Optimismus in deutlichem Kontrast zur medialen Berichterstattung stehen – allerdings, darauf weist Judith Niehues auch hin, empfinden seit der Wiedervereinigung regelmäßig mehr als zwei Drittel der Befragten die wirtschaftlichen Verhältnisse als (tendenziell) ungerecht.

*Holger Lengfeld* und *Jessica Ordemann* gehen der Frage nach, wie sich die den Mittelschichten in Deutschland vielfach zugeschriebene Angst vor einem sozialen Abstieg im Verlauf von drei Jahrzehnten (1984 bis 2014) entwickelt hat. Anhand von Daten des SOEP zeigen sie, dass in (West-)Deutschland von Mitte der 1980er Jahre bis Mitte der 2000er Jahre alle Schichten einen stetigen Anstieg von Abstiegsangst – bemessen über die Sorge vor einem Arbeitsplatzverlust – aufwiesen. Seither waren diese Sorgen bis zum Ende des Beobachtungszeitraums 2014 stark rückläufig. Es fällt zudem auf, dass sowohl während des Anstiegs als auch des Rückgangs der Abstiegsangst die mittlere Mittelschicht besonders starke Reaktionen zeigte. Entsprechend formulieren Holger Lengfeld und Jessica Ordemann ihre »These der mittleren Mitte als sensibles Zentrum der Gesellschaft«.

*Ursula Dallinger* widmet sich der Frage, ob die vieldiskutierte »Krise der Mittelschicht« veränderte Gerechtigkeitsperzeptionen und verteilungspolitische Präferenzen befördert, die dann neue klassenübergreifende Koalitionen nach sich ziehen. Ausgehend vom in Wohlfahrtsstaatsforschung und politischer Ökonomie etablierten Konzept des Mittelschichts- beziehungsweise Medianwählers, demzufolge – holzschnittartig formuliert – die Entscheidungen politischer Parteien maßgeblich von den (Umverteilungs-)Präferenzen der Mittelschicht abhängen, greift sie auf Daten des ALLBUS zurück und zeichnet für den Zeitraum von 1994 bis 2014 die Entwicklungen von Gerechtigkeitsperzeptionen und Wahlabsichten verschiedener sozialer Schichten nach. Ursula Dallingers besonderes Augenmerk ist dabei auf drei Mittelschichtssegmente gerichtet: Für diese weist sie – insbesondere ab 2008 – ein auffallend hohes Maß an wahrgenommener Ungerechtigkeit nach. Der Einfluss dieser Ungleichheitskritik auf die über die »Sonntagsfrage« ermittelten Wahlabsichten fällt allerdings divergent aus: Während die obere Mittelschicht – vor allem bei wahrgenommener Ungerechtigkeit – zu einer klassenübergreifenden Koalition mit der Oberschicht neigt und Parteien des grün-alternativen Lagers wählt, neigt die untere Mittelschicht – in Abhängigkeit von ihrem (Un-)Gerechtigkeitsempfinden – zur Wahl linker oder konservativer Parteien.

Unter der Überschrift »Wertorientierungen und Normalitätskonstruktionen« sind drei Beiträge versammelt, die tiefgehend eruieren, »wie die Mitte

tickt: welchen Maximen die Angehörigen der Mittelschicht folgen, unter welchen Vorzeichen sie Lebensführung betreiben, was sie als »normal« erachten.

*Miriam Schad* und *Nicole Burzan* interessiert dabei besonders die Frage nach dem Zusammenhang zwischen Mentalitäten in der Mitte und dem familiären Stuserhalt. Um zu erfahren, wie Mittelschichtsangehörige auf Statusirritationen reagieren, führten sie Interviews mit Mitgliedern aus drei Generationen zweier Mittelschichtsfamilien. Die Befunde ihrer explorativen Studie zeigen, dass Leistungswille, Fleiß sowie die Bereitschaft zum Aufschub von Bedürfnisbefriedigung, familiäre Solidarität und entschiedenes Statusbewusstsein geteilte Werte der Mittelschicht sind – und dass es zugleich sehr unterschiedliche Arten der Statusreproduktion gibt, die *Miriam Schad* und *Nicole Burzan* als einem »Unterstützung-Narrativ« beziehungsweise als einem »Verantwortungs-Narrativ« folgend beschreiben.

*Christine Wimbauer*, *Julia Teschlade*, *Almut Peukert* und *Mona Motakef* untersuchen – quasi in Umkehrung der Perspektive des vorigen Beitrags – die Mitte der Gesellschaft auf ihre Paar- und Familienbilder. Was nämlich überhaupt »Familie« ist, bleibt bis auf Weiteres umkämpft. Die heterosexuelle »Normalfamilie« dient nach wie vor als Folie für legitime Formen des Zusammenlebens. Die Autorinnen diskutieren die Beständigkeiten und den Wandel von Leitbildern für das Paar- und das Familienleben in der Mitte der deutschen Gesellschaft. Sie spannen dabei den Bogen von soziologischen Perspektiven auf Liebe und Familie über dominante Vorstellungen, aber auch Realitäten von Familie bis hin zur Darstellung tatsächlicher familialer Praxen jenseits der heterosexuellen »Normalfamilie«. Die Rolle der gesellschaftlichen Mitte hinsichtlich der Persistenz und des Wandels dieser Leitbilder ist dabei ambivalent: Sie ist sowohl die Bewahrerin alter, überkommener Vorstellungen als auch Ort von Neuerungen, von »abweichenden« Wertvorstellungen und Lebensformen.

*Marlon Barbehön*, *Marilena Geugjes* und *Michael Haus* schließlich analysieren aus diskurstheoretischer Sicht empirisch die mediale Repräsentation der Distinktionen und Normalitätsansprüche der Mittelschicht. Deren Werte und Lebensstile sind von diesem Standpunkt aus Attribute, die der gesellschaftlichen Mitte – hier: durch bürgerliche Qualitätszeitungen – zugeschrieben werden und so zu ihrer (Re-)Konstruktion beitragen. Derart wird sie in diesem Beitrag weder sozialstrukturell noch ökonomisch und auch nicht milieusozologisch gefasst. Vielmehr ist die Mittelschicht, so das Argument, ein »leerer Signifikant«, ein Diskursprodukt, in dem ein scheinbar Allgemeines unterschiedliche, teils widerstreitende Positionen und Äußerungen in sich aufnimmt und dadurch selbst bar konkreter Bedeutungsgehalte, also leer und äußerst anschlussfähig, wird. Diskurse erzeugen mit einem Gegenstand wie der Mittelschicht stets ein Äußeres, das Andere seiner selbst: Indem sie als arbeitend, gebildet, autonom und vernünftig gezeichnet wird, sind andere Schichten all dies genau nicht. Die medial konstruierte Mittelschicht ist mit-



hin eine distinkte, sich distinguierende und gleichzeitig Normalität und gesellschaftliche Standards verkörpernde Einheit.

Nachdem dergestalt diverse Deutungsangebote zu den Werten, Normen und Normalitätsvorstellungen der Mitte ausgebreitet sind, richten die folgenden vier Beiträge ihr Augenmerk aus unterschiedlichen analytischen Perspektiven auf die Abgrenzungs- und Schließungsprozesse, die sich im globalen Norden in Form eines drohenden Siegeszugs des Rechtspopulismus manifestieren.

*Stephan Lessenich* dekonstruiert vor dem Hintergrund des deutschen Mittelschichtsdiskurses der Sozialstrukturanalyse seit Theodor Geiger nicht nur die Rede von den Abstiegsängsten und -kämpfen sowie den Mitte-Begriff selbst als Kategorie des Ein- wie des Ausschlusses, sondern auch die (vermeintliche) Erfolgsgeschichte der nordatlantischen, aufstiegsorientierten Mittelschichtsgesellschaften. Diese Geschichte ist nämlich zugleich diejenige kaum sichtbarer »weiblicher und migrantischer Zuarbeit« sowie weltweiter Ausbeutung und Externalisierung ökologischer Kosten. Deren Erträge, so die These von Stephan Lessenich, sollen in gegenwärtig stattfindenden »Mittelklassenkämpfen« erhalten und abgesichert werden.

*Cornelia Koppetsch* entwickelt ihre Argumentation zur räumlichen Selbstvergewisserung und darauf aufbauenden Abgrenzung der Mittelschichten in Zeiten des Entstehens transnationaler Klassen ausgehend von der Diagnose, dass derzeit ein neuartiger Heimatdiskurs stattfindet. Auch hier ließe sich von »Mittelklassenkämpfen« sprechen, und zwar von solchen zwischen denjenigen Teilen der Mittelschicht, die einen kulturkosmopolitischen Lebensstil pflegen – grosso modo: die Akademikerklasse –, und denjenigen, die mit weniger kulturellem Kapital ausgestattet einem eher nativistischen Heimatverständnis anhängen. Beide Mittelschichtgruppen sind Produkte der Transnationalisierung wirtschaftlicher Wertschöpfung und politischer Steuerung, die neue, nationenübergreifende Klassenstrukturen mit sich bringen: Während die urban geprägten akademischen Fraktionen der Mitte von der Globalisierung profitieren und zur transnationalen Oberschicht werden, drohen die (noch) national etablierten Mittelklassen mit ländlicher oder kleinstädtischer Verwurzelung global abgehängt zu werden – weshalb, so Cornelia Koppetschs Argument, der Kampf um soziale Stabilität ihnen zum Kampf um heimatliches Terrain wird.

*Sylke van Dyk* plädiert dafür, die gegenwärtigen sozialstrukturellen und sozioökonomischen Herausforderungen der gesellschaftlichen Mitte auch mit poststrukturalistischem, praxis- und diskurstheoretischem Instrumentarium zu analysieren. Derart, so ihr Argument, lässt sich das Zusammenspiel von Normativität und Mitte – hier: unter Bedingungen ihrer Erschütterung – erkennen und fruchtbar untersuchen. Wie schon Marlon Barbehön, Marilena Geugjes und Michael Haus kommt auch Sylke van Dyk zu dem Schluss, dass es sich bei der Mitte um einen »leeren Ort des Allgemeinen«, um einen »empty

signifier« im Sinne Ernesto Laclaus handelt. Sie geht nun der Frage nach, was das Außen, das radikal Andere der Mitte ist, das diese erst konstituiert, und wie es sich entlang der Ränder des Sozialen seit der fordistischen Ära gewandelt hat. Am Ende steht die Einsicht, dass derzeit nicht allein Verteilungsfragen verhandelt werden, sondern auch Fragen nach Zugehörigkeit und Nicht-Zugehörigkeit zur sozialen Mitte im Zuge einer Bewertung von Subjektivitäten als ›normal‹ – oder eben als anders, als unpassend, als auszuschließend.

*Uwe Schimank* entwirft in seinem Beitrag eine Typologie der Mittelschichten und skizziert entlang verschiedener Konstellationen und ihrer Bezüge zur Unter- und Oberschicht ein theoretisches Modell, das hier dem beschreibenden Erklären der Genese der rechtspopulistischen Mitte dient. Die zentralen Parameter der vier Typen beziehungsweise Fraktionen sind ihre jeweiligen Ausstattungen und Ausstattungsrelationen mit ökonomischem und kulturellem Kapital. Kennzeichen der Mittelschichten ist, dass sie dieses Kapital zur »investiven Statusarbeit« (Schimank et al. 2014) nutzen. Diese Arbeit in eigener Sache hat die Mitte in den vergangenen Jahrzehnten unter Bedingungen des kulturellen Siegeszugs von Identitätspolitikern einerseits und der Rückkehr verstärkter sozioökonomischer Ungleichheit andererseits verrichtet. Ihre einzelnen Fraktionen wurden hiervon höchst unterschiedlich tangiert und in ihren Positionen im sozialen Gefüge beeinflusst. Sie stehen sich heute als sogenannte neue Mittelklasse (gut ausgestattet mit kulturellem Kapital) und als alte (eher nicht akademisch situierte) gegenüber. Erheblichen Teilen Letzterer attestiert Uwe Schimank massive Verunsicherung darüber, dass die eigene Position zukünftig zu unsicher für fortgesetzte investive Statusarbeit sein könnte: Als Ausgleich, als Ersatz für nicht mehr ausreichende Kapitalausstattungen wird dann womöglich die Zugehörigkeit zum »deutschen Volk« in Anschlag gebracht.

Grenzziehungspraktiken, Identitätsbehauptungen sowie Befindlichkeiten der Mittelschichtsangehörigen werden in den anschließenden vier Beiträgen empirisch untersucht.

*Patrick Sachweh, Sarah Lenz und Debora Eicher* nehmen im Kontext einer subjektorientierten Sozialstrukturanalyse eine mikrosoziologische Innenperspektive auf soziale Klassen ein und fragen danach, wie Angehörige unterschiedlicher hierarchisch angeordneter Gesellschaftssegmente ihre eigene Lage wahrnehmen – und wie sie sich respektive andere klassifizieren. Hierzu greifen sie im Anschluss an Michèle Lamont auf das Konzept der »symbolischen Grenzziehungen« zurück, durch das »die Objektivität ungleicher sozialer Lagen und Lebensverhältnisse Eingang ins Alltagsbewusstsein der Menschen« findet. Als empirisches Material dienen ihnen qualitative Interviews und Gruppendiskussionen. Ihre Typologie der gruppenspezifischen Selbst- und Fremdbilder arbeitet symbolische Grenzen und distinkte soziale Identitäten heraus: Während mittlere Klassen einen »Ethos der Mäßigung und

des planvollen Realismus« pflegen, folgen die oberen Klassen einem »Ethos der Distinktion und der Kultiviertheit« – beide Segmente positionieren sich also über sozioökonomische und kulturelle Grenzziehungen zu ihrer sozialen Umwelt. Den unteren Klassen bleibt in Ermangelung nennenswerter sozioökonomischer und kultureller Ressourcen hingegen nichts weiter, als sich durch moralische Grenzziehungen zu platzieren und einen »Ethos der Solidarität und des Abgebens« zu kultivieren.

*Friederike Bahl* fokussiert auf einen speziellen, in der Mittelschichtsdebatte häufig unterbelichteten Teil des in sich ausdifferenzierten mittleren Segments bereits stark tertiärisierter (Erwerbs-)Gesellschaften: Sie untersucht Angestellte in Routinedienstleistungsberufen. Während die ungleichheitssoziologische Diskussion um die gesellschaftliche Mitte von einer »Chancenrhetorik« geprägt ist und Zukunftssorgen für weite Teile der gesellschaftlichen Mitte qualifizierter Dienstleistungstätigkeiten in eins gesetzt werden mit Sorgen um Stuserhalt und Aufstiegs Optionen, greift im unteren Dienstleistungssegment die »Logik marktbezogener Statusfatalität«. Hier geht es bisweilen ums nackte, nach Möglichkeit sozialstaatsunabhängige Überleben, und die der Mittelschicht so häufig attribuierte entscheidungs- und handlungsleitende Zukunftsorientierung entbehrt jeglicher alltagspraktischen Bedeutung. Friederike Bahl hebt hervor, dass in einer erwerbszentrierten Gesellschaft die Frage der Ungleichheit »immer noch eng mit der Frage nach der Zukunft der Arbeit verbunden« ist.

*Patricia Pfeil, Marion Müller und Udo Dengel* widmen sich einem biographisch heiklen Thema, nämlich der Überschuldung und Insolvenz von Mittelschichtsangehörigen. Ihnen geht es um die Frage, wie Mittelschichtsangehörige mit dieser krisenhaften Erfahrung umgehen und welche Praktiken sie entwickeln, um (sich) ihre Identität als Mittelschichtsangehörige zu bewahren. Zu diesem Zweck führten sie über einen Zeitraum von drei Jahren jeweils drei Interviews mit 14 betroffenen Paaren sowie einigen Einzelpersonen mittleren Alters. Anhand der drei symbolträchtigen und identitätsstiftenden Mittelschichtsmerkmale Wohnen, (Alltags-)Mobilität und Urlaub schildern sie die intensiven Bemühungen überschuldeter und insolventer Mittelschichtsangehöriger, »Normalität« unter Aufbietung aller Kräfte zu wahren. Sie machen deutlich, »dass die Zugehörigkeit zur Mittelschicht aufgrund des Status »überschuldet/insolvent« nicht mehr unhinterfragt besteht, sondern von den Betroffenen explizit hergestellt werden muss.« Die in der Gegenwartsgesellschaft verbreitete Fixierung auf (bezahlte) Erwerbsarbeit lässt Betroffene mitunter – ersatzweise – ein Ehrenamt ausführen. Eine weitere Form des »Doing Mittelschicht« besteht in der läuternden »Rückbesinnung auf tradierte Werte«, wie sie beispielsweise in den (noch) weitgehend nicht-ökonomisierten Sphären der Familie oder der Naturverbundenheit anzutreffen sind.

*Gunter Weidenhaus* fragt nach der sozialen Raum- und Zeitkonstitution von Mittelschichtsangehörigen: Wie stellen sie sich räumlich und zeitlich in die Welt? Auf der Grundlage zweier qualitativer Studien ermittelt er explorativ zwei sich deutlich unterscheidende Modi der Anverwandlung von Raum und Zeit. Als »klassisch« bezeichnet Gunter Weidenhaus das »konzentrisch-lineare« Modell, das durch eine linear biographisierende Aneignung der Zukunft und eine konzentrische Raumkonstitution – nämlich um das eigene Zuhause und den Wohnort herum – charakterisiert ist. Angesichts gesellschaftlicher Dynamiken, die sich insbesondere in Form von Beschleunigung und Flexibilisierung äußern und einst stabile institutionelle Rahmenbedingungen brüchig werden lassen, ist dieser Typus allerdings in die Krise geraten. In Reaktion auf diese Veränderungen hat sich als Alternative zum »konzentrisch-linearen« Modell das »netzwerkartig-episodische« Modell entwickelt: Orte verlieren an Relevanz – an ihre Stelle treten »Atmosphären, Szenen und unspezifische Optionen«, die mit bestimmten Lokalitäten assoziiert sind –, und das eigene Leben wird als projektförmig begriffen.

*Oliver Dimbath* formuliert im Abschlussbeitrag die starke These, dass soziologische Zeitdiagnosen einem Mittelschicht-Bias unterliegen: Zeit- und Gesellschaftsdiagnosen, die als scharf zu lesende Beobachtungen der Gesellschaft oftmals an der Schnittstelle zwischen Sozialstrukturanalyse und Public Sociology verortet sind, werden in aller Regel von Angehörigen der sozialen Mittelschichten für Angehörige der sozialen Mittelschichten verfasst und handeln von typischen Angelegenheiten der sozialen Mittelschichten. Diese »Tendenz hin zur Fokussierung der soziodemographischen Mitte« mündet in eine latente Hegemonialstellung der Mittelschichten, ihres der gesamten Gesellschaft *pars pro toto* verordneten seismographischen Instrumentariums und ihres Wertehorizonts. Eine solche Mittelschichtdominanz ist bei genauerem Hinsehen unverkennbar – sie ist in ihrer Genese und in ihren Effekten allerdings erklärungsbedürftig. Dem geht Oliver Dimbath in seinem diesen Sammelband abschließenden Beitrag, der etliche Aspekte der vorangegangenen Diskussionen explizit oder implizit anführt und zugleich von einer Meta-Ebene betrachtet, nach.

Wir hoffen, dass Ihre Lektüre der hier von uns versammelten und von den Beitragenden entwickelten Begriffe, Sichtweisen, Zugänge, Diagnosen und – ja, auch dies! – Empfehlungen zur »Mitte als Kampfzone« dazu führt, produktiv miteinander ins Gespräch zu kommen und weiterführende Fragen, Ideen und vielleicht Lösungsmöglichkeiten für ernsthafte und drängende gesellschaftliche Probleme zu initiieren.

## LITERATUR

- Acemoglu, Daron/Robinson, James A. (2006): *Economic Origins of Dictatorship and Democracy*, Cambridge: Cambridge University Press.
- Alderson, Arthur S./Beckfield, Jason/Nielsen, François (2005): »Exactly How Has Income Inequality Changed? Patterns of Distributional Change in Core Societies«, in: *International Journal of Comparative Sociology* 46, S. 405-423, doi: <https://doi.org/10.1177/0020715205059208>.
- Alesina, Alberto/Di Tella, Rafael/MacCulloch, Robert (2004): »Inequality and happiness: are Europeans and Americans different?«, in: *Journal of Public Economics* 88, S. 2009-2042, doi: <https://doi.org/10.1016/j.jpubeco.2003.07.006>.
- Amoranto, Glenita/Chun, Natalie/Deolalikar, Anil (2010): »Who are the Middle Class and What Values do They Hold? Evidence from the World Values Survey«, AB Economics Working Paper Series No. 229.
- Bundeszentrale für politische Bildung (Hg.) (2014): »Mitte«, in: *Aus Politik und Zeitgeschichte* 49, Bonn: Bundeszentrale für politische Bildung.
- Barro, Robert J. (1999): »Determinants of Democracy«, in: *Journal of Political Economy* 107, S. 158-183, doi: <https://doi.org/10.1086/250107>.
- Beise, Marc (2009): *Die Ausplünderung der Mittelschicht. Alternativen zur aktuellen Politik*, München: Deutsche Verlags-Anstalt.
- Bigot, Régis/Crouette, Patricia/Muller, Jörg/Osier, Guillaume (2012): »The Middle Classes in Europe. Evidence from the LIS Data«, LIS Working Paper Series No. 580.
- Birdsall, Nancy (2015): »Does the Rise of the Middle Class Lock in Good Government in the Developing World? Essay«, Center for Global Development.
- Bosch, Gerhard/Kalina, Thorsten (2015): »Die Mittelschicht in Deutschland unter Druck«, IAQ-Bericht 4/2015.
- Brady, David (2009): »Economic Globalization and Increasing Earnings Inequality in Affluent Democracies«, in: *Economic Sociology of Work: Research in the Sociology of Work* 18, S. 149-181.
- Burkhardt, Christoph/Grabka, Markus/Groh-Samberg, Olaf/Lott, Yvonne/Mau, Steffen (2012): *Mittelschicht unter Druck?*, Gütersloh: Bertelsmann Stiftung.
- Burzan, Nicole/Kohrs, Silke/Küsters, Ivonne (2014): *Die Mitte der Gesellschaft: Sicherer als erwartet?*, Weinheim/Basel: Beltz Juventa.
- Crouch, Colin (1999): *Social Change in Western Europe*, Oxford: Oxford University Press.
- Das, Dilip K. (2009): »Globalisation and an Emerging Global Middle Class«, in: *Economic Affairs* 29, S. 89-92, doi: <https://doi.org/10.1111/j.1468-0270.2009.01927.x>.

- DiPrete, Thomas A. (2005): »Labor Markets, Inequality, and Change. A European Perspective«, in: *Work and Occupations* 32, S. 119-139, doi: <https://doi.org/10.1177/0730888405274511>.
- Dörre, Klaus/Bose, Sophie/Lütten, John/Köster, Jakob (2018): »Arbeiterbewegung von rechts? Motive und Grenzen einer imaginären Revolte«, in: *Berliner Journal für Soziologie*, Online-Veröffentlichung vor Druckfassung, doi: <https://doi.org/10.1007/s11609-018-0352-z>.
- Easterly, William (2001): »The Middle Class Consensus and Economic Development«, in: *Journal of Economic Growth* 6, S. 317-355.
- Ehrenreich, Barbara (1989): *Fear of Falling. The Inner Life of the Middle Class*, New York: Harper Collins.
- Fratzscher, Marcel (2017): »Und die Ungleichheit hat doch zugenommen«, in: *DIE ZEIT* vom 15.09.2017, <https://www.zeit.de/wirtschaft/2017-09/soziale-gerechtigkeit-ungleichheit-bundestagswahlkampf-debatte-wissenschaft> (24.07.2018).
- Gimpelson, Vladimir/Treisman, Daniel (2015): »Misperceiving Inequality«, NBER Working Paper Series No. 21174.
- Glatzer, Wolfgang (2008): »Well-being: Perception and Measurement«, in: Council of Europe (Hg.), *Well-being for all. Concepts and Tools for Social Cohesion*, Strasbourg: Council of Europe Publishing, S. 99-118.
- Glatzer, Wolfgang (2012): »Cross-National Comparisons of Quality of Life in Developed Nations, Including the Impact of Globalization«, in: Kenneth C. Land/Alex C. Michalos/M. Joseph Sirgy, (Hg.), *Handbook of Social Indicators and Quality of Life Research*, Dordrecht: Springer, S. 381-398.
- Grabka, Markus M./Frick, Joachim R. (2008): »Schrumpfende Mittelschicht – Anzeichen einer dauerhaften Polarisierung der verfügbaren Einkommen?«, in: *DIW Wochenbericht* 75, S. 101-108.
- Heinze, Rolf G. (2011): *Die erschöpfte Mitte. Zwischen marktbestimmten Soziallagen, politischer Stagnation und der Chance auf Gestaltung*, Weinheim/Basel: Beltz Juventa.
- Herbert-Quandt-Stiftung (Hg.) (2007): *Zwischen Erosion und Erneuerung. Die gesellschaftliche Mitte in Deutschland. Ein Lagebericht*, Frankfurt a.M.: Societäts-Verlag.
- Kadritzke, Ulf (2017): *Mythos »Mitte«. Oder: Die Entsorgung der Klassenfrage*, Berlin: Bertz + Fischer.
- Kharas, Homi (2010): »The Emerging Middle Class in Developing Countries«, OECD Development Centre Working Paper No. 285.
- Koppetsch, Cornelia (2013): *Die Wiederkehr der Konformität. Streifzüge durch die gefährdete Mitte*, Frankfurt a.M./New York: Campus.
- Larsen, Christian Albrekt (2013): *The Rise and Fall of Social Cohesion. The Construction and De-construction of Social Trust in the US, UK, Sweden*

- and Denmark, Oxford: Oxford University Press, doi: <https://doi.org/10.1093/acprof:oso/9780199681846.001.0001>.
- Littrell, Jill/Brooks, Fred/Ivery, Jan/Ohmer, Mary L. (2010): »Why You Should Care About the Threatened Middle Class«, in: *Journal of Sociology & Social Welfare* 37, S. 87-113.
- Mau, Steffen (2012): *Lebenschancen. Wohin driftet die Mittelschicht?*, Berlin: Suhrkamp.
- Milanović, Branko (2016): *Die ungleiche Welt. Migration, das Eine Prozent und die Zukunft der Mittelschicht*, Berlin: Suhrkamp.
- Nachtwey, Oliver (2016): *Die Abstiegs-gesellschaft. Über das Aufbegehren in der regressiven Moderne*, Berlin: Suhrkamp.
- Newman, Katherine S. (1988): *Falling from Grace. Downward Mobility in the Age of Affluence*, Berkeley: University of California Press.
- Niehues, Judith (2014): »Subjective Perceptions of Inequality and Redistributive Preferences. An International Comparison«, *IW-Trends Discussion Papers* No. 2.
- OECD (2008): »Growing Unequal? Income Distribution and Poverty in OECD Countries«, Paris: OECD Publishing, [www.oecd.org/els/soc/growingunequalincomedistributionandpovertyinoecdcountries.htm](http://www.oecd.org/els/soc/growingunequalincomedistributionandpovertyinoecdcountries.htm) (16.07.2018).
- OECD (2011): »Divided We Stand. Why Inequality Keeps Rising«, Paris: OECD Publishing, [www.oecd.org/els/soc/dividedwestandwhyinequalitykeepsrising.htm](http://www.oecd.org/els/soc/dividedwestandwhyinequalitykeepsrising.htm) (16.07.2018).
- Pressman, Steven (2007): »The Decline of the Middle Class: An International Perspective«, in: *Journal of Economic Issues* 41, S. 181-200, doi: <https://doi.org/10.1080/00213624.2007.11507000>.
- Ravallion, Martin (2010): »The Developing World's Bulging (but Vulnerable) Middle Class«, in: *World Development* 38, S. 445-454, doi: <https://doi.org/10.1016/j.worlddev.2009.11.007>.
- Reckwitz, Andreas (2017): *Die Gesellschaft der Singularitäten. Zum Strukturwandel der Moderne*, Berlin: Suhrkamp.
- Schimank, Uwe/Mau, Steffen/Groh-Samberg, Olaf (2014): *Statusarbeit unter Druck? Zur Lebensführung der Mittelschichten*, Weinheim/Basel: Beltz Juventa.
- Schöneck, Nadine M. (2017): »Determinanten der Wahrnehmung sozialer Konflikte. Objektive und subjektive Faktoren im Ländervergleich«, in: Stephan Lessenich (Hg.), *Geschlossene Gesellschaften. Verhandlungen des 38. Kongresses der Deutschen Gesellschaft für Soziologie in Bamberg 2016*, [http://publikationen.sozio-logie.de/index.php/kongressband\\_2016/article/view/369](http://publikationen.sozio-logie.de/index.php/kongressband_2016/article/view/369) (08.08.2018).
- Solimano, Andrés (2008): »The middle class and the development process«, *Serie macroeconomía des desarrollo* 65, Santiago: United Nations.

- Steijn, Bram/Berting, Jan/de Jong, Mart-Jan (Hg.) (1998): *Economic Restructuring and the Growing Uncertainty of the Middle Class*, Boston: Kluwer.
- Stokowski, Margarete (2018): Integrieren – in was?, in: SPIEGEL ONLINE vom 24.07.2018, [www.spiegel.de/kultur/gesellschaft/integrieren-in-was-kolumne-a-1219904.html](http://www.spiegel.de/kultur/gesellschaft/integrieren-in-was-kolumne-a-1219904.html) (28.07.2018).
- Therborn, Göran (2012): »Class in the 21st century«, in: *New Left Review* 78, S. 5-29.
- Vogel, Berthold (2009): *Wohlstandskonflikte. Soziale Fragen, die aus der Mitte kommen*, Hamburg: Hamburger Edition.
- Weeks, John (2005): »Inequality Trends in Some Developed OECD Countries«, DESA Working Paper No. 6.
- Wilkinson, Richard G./Pickett, Kate (2009): *The Spirit Level. Why More Equal Societies Almost Always Do Better*, London: Allen Lane.
- Wilson, Dominic/Dragusanu, Raluca (2008): »The Expanding Middle. The Exploding World Middle Class and Falling Global Inequality«, Goldman Sachs Global Economics Paper No. 170.
